# Supplementary material for: A New Master Donor Virus for the Development of Live-Attenuated Influenza B Virus Vaccines
Source: MDPI journal article supplement (doi:10.3390/v13071278), 2021-06-30
Supplement: s1 [file s1]

## Amino acid alignment of B/Ann Arbor/1/1966 and B/Brisbane/60/2008 PB2

|                    |                                                               |
|--------------------|---------------------------------------------------------------|
| B/Ann Arbor/1/1966 | MTLAKIELLLKQLLRDNEAKTVLKQTTVDQYNIIRKFNTSRIERNPSLRMKWAMCSNFPLA |
| B/Brisbane/60/2008 | MTLAKIELLLKQLLRDNEAKTVLKQTTVDQYNIIRKFNTSRIEKNPSLRMKWAMCSNFPLA |
| B/Ann Arbor/1/1966 | LTKGDMANRIPLEYKGIIRLKTNAEDIGTKGQMCSIAAVTWNTYGPIDTEGFEKVYESF   |
| B/Brisbane/60/2008 | LTKGDMANRIPLEYKGIQLKTNAEDIGTKGQMCSIAAVTWNTYGPIDTEGFERVYESF    |
| B/Ann Arbor/1/1966 | FLRKMRLDNATWGRITFGPVERVRKRVLLNPLTKEMPPDEASNVIMEILFPKEAGIPRES  |
| B/Brisbane/60/2008 | FLRKMRLDNATWGRITFGPVERVRKRVLLNPLTKEMPPDEASNVIMEILFPKEAGIPRES  |
| B/Ann Arbor/1/1966 | TWMHRELIIKEKREKLKGTMITPIVLAYMLERELVARRRFLPVAGATSAEFIEMLHCLQGE |
| B/Brisbane/60/2008 | TWTHRELIIKEKREKLKGTMITPIVLAYMLERELVARRRFLPVAGATSAEFIEMLHCLQGE |
| B/Ann Arbor/1/1966 | NWRQIYHPGGNKLTESRSQSMIVACRKIVRRSIVASNPLELAVEIANKTVIDTEPLKSCL  |
| B/Brisbane/60/2008 | NWRQIYHPGGNKLTESRSQSMIVACRKIIIRRSIVASNPLELAVEIANKTVIDTEPLKSCL |
| B/Ann Arbor/1/1966 | AAIDGGDVACDIIRAALGLKIRQRQFRGLELKRISGRGFKNDDEEILIGNGTIQKIGIWD  |
| B/Brisbane/60/2008 | AAXDGGDVACDIIRAALGLKIRQRQFRGLELKRISGRGFKNDDEEILIGNGTIQKIGIWD  |
| B/Ann Arbor/1/1966 | GEEEFHVRCGECRGILKKSCKMRMEKLLINSAKKEDMKDLIILCMVFSQDTRMFQGVGEI  |
| B/Brisbane/60/2008 | GEEEFHVRCGECRGILKKSCKMKLEKLLINSAKKEDMRDLIILCMVFSQDTRMFQGVGEI  |
| B/Ann Arbor/1/1966 | NFLNRAGQLLSPMYQLQRYFLNRSNDLFDQWGYEESP                         |
| B/Brisbane/60/2008 | NFLNRAGQLLSPMYQLQRYFLNRSNDLFDQWGYEESPKASELHGINESMNASDYTLKGIV  |
| B/Ann Arbor/1/1966 | VTKNVIDDFSSITEKVSITKNLSLIKRTGEVIMGANDVSELESQAQLMITYDTPKMWEM   |
| B/Brisbane/60/2008 | VTRNVIDDFSSITEKVSITKNLSLIKRTGEVIMGANDVSELESQAQLMITYDTPKMWEM   |
| B/Ann Arbor/1/1966 | GTTKELVQNTYQWVLKNLVTLKAQFLLGKEDMFQWDAFEAFESIIPQKMAGQYSGFARAV  |
| B/Brisbane/60/2008 | GTTKELVQNTYQWVLKNLVTLKAQFLLGKEDMFQWDAFEAFXSIIIPQKMAGQYSGFARAV |
| B/Ann Arbor/1/1966 | LKQMRDQEVMTDQFIKLLPFCFSPPKLRSN                                |
| B/Brisbane/60/2008 | LKQMRDQEVMTDQFIKLLPFCFSPPKLRSN                                |
| B/Ann Arbor/1/1966 | YNPQTEVLTICGRMMSLKKGIEDEERNRSMGNAVLAVGFLVSGKYDPLGDFKTIEELEKL  |
| B/Brisbane/60/2008 | YNPQTEVLTICGRMMSLKKGIEDEERNRSMGNAVLAVGFLVSGKYDPLGDFKTIEELEKL  |
| B/Ann Arbor/1/1966 | KPGEKANILLYQGKPVKVVKRKRYALSNDISQGIKRQRTVESMGWALS              |
| B/Brisbane/60/2008 | KPGEKANILLYQGKPVKVVKRKRYALSNDISQGIKRQRTVESMGWALS              |

■ = amino acid identical

□ = amino acid changes

■ = amino acid changes present in the cold adapted MDV

### Amino acid changes:

|       |       |
|-------|-------|
| R43K  | R78Q  |
| K115R | M183I |
| V291T | I303X |
| R382K | M383L |
| K397R | P456S |
| L468S | V479I |
| K483R | T492I |
| E582X | R639K |
| M641V |       |

# Amino acid alignment of B/Ann Arbor/1/1966 and B/Brisbane/60/2008 PB1

|                    |                                                               |                                                          |
|--------------------|---------------------------------------------------------------|----------------------------------------------------------|
| B/Ann Arbor/1/1966 | MNINPYFLFIDVPI                                                | QAAISTTFPYTGVPYSHGTGTGYTIDTVIRTHEYSNKGKQYISDV            |
| B/Brisbane/60/2008 | MNINPYFLFIDVPI                                                | QAAISTTFPYTGVPYSHGTGTGYTIDTVIRTHEYSNKGKQYISDV            |
| B/Ann Arbor/1/1966 | TGCAM                                                         | MVDPTNGPLPEDNEPSAYAQLDCVLEALDRMDEEHPGLFQAASQNAMEALMVTTVD |
| B/Brisbane/60/2008 | TGCTM                                                         | MVDPTNGPLPEDNEPSAYAQLDCVLEALDRMDEEHPGLFQAASQNAMEALMVTTVD |
| B/Ann Arbor/1/1966 | KLTQGRQTFDWTVCRNQPAATALNTTITSFRLNDLNGADKGG                    | LVPFCQDIIDS                                              |
| B/Brisbane/60/2008 | KLTQGRQTFDWTVCRNQPAATALNTTITSFRLNDLNGADKGG                    | LVPFCQDIIDS                                              |
| B/Ann Arbor/1/1966 | FFSVKNIKKKLPAKNRKGFLIKRIPMKVKDR                               | ITRVEYIKRALSLNTMTKDAERGKLRRA                             |
| B/Brisbane/60/2008 | FFSVKNIKKKLPAKNRKGFLIKRIPMKVKDK                               | ITKVEYIKRALSLNTMTKDAERGKLRRA                             |
| B/Ann Arbor/1/1966 | IATAGIQIRGFVLVVENLAKNICENLEQSGLPVGGNEKKAKLSNAVAKMLSNCPPGGISM  |                                                          |
| B/Brisbane/60/2008 | IATAGIQIRGFVLVVENLAKNICENLEQSGLPVGGNEKKAKLSNAVAKMLSNCPPGGISM  |                                                          |
| B/Ann Arbor/1/1966 | TVTGDNTKWNECLNPRIFLAMTERITRDSPI                               | WFRDFCSIAPVLF                                            |
| B/Brisbane/60/2008 | TVTGDNTKWNECLNPRIFLAMTERITRDSPI                               | WFRDFCSIAPVLF                                            |
| B/Ann Arbor/1/1966 | TKRLKAQIPCPDLFN                                               | IPLERYNEETRAKLKKLPFFNEEGTASLSPGMMMGMFNM                  |
| B/Brisbane/60/2008 | TKRLKAQIPCPDLFS                                               | IPLERYNEETRAKLKKLPFFNEEGTASLSPGMMMGMFNM                  |
| B/Ann Arbor/1/1966 | GVAALGIKNIGNR                                                 | EYLWDGLQSSDDFALFVNAKDEETCMEGINDFYRTCKLLG                 |
| B/Brisbane/60/2008 | GVAALGIKNIGNR                                                 | EYLWDGLQSSDDFALFVNAKDEETCMEGINDFYRTCKLLG                 |
| B/Ann Arbor/1/1966 | SYCNETGMFEFTSMFYRDGFVSNFAMELPSFGVAGVNESADMAIGMTIIKNNMINNGMGP  |                                                          |
| B/Brisbane/60/2008 | SYCNETGMFEFTSMFYRDGFVSNFAMELPSFGVAGVNESADMAIGMTIIKNNMINNGMGP  |                                                          |
| B/Ann Arbor/1/1966 | ATAQTAIQLFIADYRYTYKCHRGDSKVEGKRMKIIKELWENTKGRDGLLVADGGPNIIYNL |                                                          |
| B/Brisbane/60/2008 | ATAQTAIQLFIADYRYTYKCHRGDSKVEGKRMKIIKELWENTKGRDGLLVADGGPNIIYNL |                                                          |
| B/Ann Arbor/1/1966 | RNLHIPEIVLKYNLMDPEYKGRLLHPQNPFVGHLSIEGIKEADITPAHGPI           | KKMDYDAVS                                                |
| B/Brisbane/60/2008 | RNLHIPEIVLKYNLMDPEYKGRLLHPQNPFVGHLSIEGIKEADITPAHGPI           | KKMDYDAVS                                                |
| B/Ann Arbor/1/1966 | GTHSWRTRKNRSILNTDQRNMILEEQCYAKCCNLFEACFNSASYRKVPVQHSMLEAMAHR  |                                                          |
| B/Brisbane/60/2008 | GTHSWRTRKNRSILNTDQRNMILEEQCYAKCCNLFEACFNSASYRKVPVQHSMLEAMAHR  |                                                          |
| B/Ann Arbor/1/1966 | LRMDARLDYESGRMSKDDFEKAMAHLGEIGHI                              |                                                          |
| B/Brisbane/60/2008 | LRMDARLDYESGRMSKDDFEKAMAHLGEIGYI                              |                                                          |

     = amino acid identical  
 = amino acid changes

## Amino acid changes:

|       |       |
|-------|-------|
| I14V  | A64T  |
| V164T | K176R |
| R211K | R214K |
| I331V | N375S |
| R433K | I474V |
| I651V | H751Y |

# Amino acid alignment of B/Ann Arbor/1/1966 and B/Brisbane/60/2008 PA

|                    |                                                                |
|--------------------|----------------------------------------------------------------|
| B/Ann Arbor/1/1966 | MDTFITRNFQTTIIQAKNTMAEFSEDPELQPAMLFNICVHLEVCYVISDMNFLDEEGKT    |
| B/Brisbane/60/2008 | MDTFITRNFQTTIIQAKNTMAEFSEDPELQPAMLFNICVHLEVCYVISDMNFLDEEGKA    |
| B/Ann Arbor/1/1966 | YTALEGQGKEQNLRPQYEVIEGMPRNIAWMVQRSLAQEHGIETPRYLADLFDYKTKRFIE   |
| B/Brisbane/60/2008 | YTALEGQGKEQNLRPQYEVIEGMPRTIAWMVQRSLAQEHGIETPKYLADLFDYKTKRFIE   |
| B/Ann Arbor/1/1966 | VGITKGLADDYFWKKKEKLGNSMELMIFSYNQDYSLSNEHSLDEEGKGRVLSRLTELQAE   |
| B/Brisbane/60/2008 | VGITKGLADDYFWKKKEKLGNSMELMIFSYNQDYSLSNESLDEEGKGRVLSRLTELQAE    |
| B/Ann Arbor/1/1966 | LSLKNLWQVLIGEEDIKKGIDFKLGQTISKLRDISVPAGFSNFEGMRSYIDNIDPKGAIE   |
| B/Brisbane/60/2008 | LSLKNLWQVLIGEEDVEKKGIDFKLGQTISRILRDISVPAGFSNFEGMRSYIDNIDPKGAIE |
| B/Ann Arbor/1/1966 | RNLARMSPLVSVTPKKLKWEDLRPIGPHIYSHELPEVPYNAFLIMSDELGLANMTEGSKS   |
| B/Brisbane/60/2008 | RNLARMSPLVSVTPKKLTWEDLRPIGPHIYDHELPEVPYNAFLIMSDELGLANMTEGSKS   |
| B/Ann Arbor/1/1966 | KPKTLAKECLEKYSTLRDQTDPIILIMKSEKANENFLWKLWRDCVNTISNEETSNELQKTN  |
| B/Brisbane/60/2008 | KPKTLAKECLEKYSTLRDQTDPIILIMKSEKANENFLWKLWRDCVNTISNEETSNELQKTN  |
| B/Ann Arbor/1/1966 | YAKWATGDGLTYQKIMKEVAIDDETMYYQEEPkipNKRVAAWVQTEMNLLSTLTskRALD   |
| B/Brisbane/60/2008 | YAKWATGDGLTYQKIMKEVAIDDETMCYQEEPkipNKRVAAWVQTEMNLLSTLTskRALD   |
| B/Ann Arbor/1/1966 | LPEIGPDVAPVEHVGSERRKYFVNEINYCKASTVMMKYVLFHTSLLNESNASMGKYKVIP   |
| B/Brisbane/60/2008 | LPEIGPDIAPVEHVGSERRKYFVNEINYCKASTVMMKYVLFHTSLLNESNASMGKYKVIP   |
| B/Ann Arbor/1/1966 | ITNRVVNEKGESFDIILYGLAVKGQSHLRGDTDVVTVVTFEFSSTDPRVDSGKWPKYTVFR  |
| B/Brisbane/60/2008 | ITNRVVNEKGESFDMLYGLAVKGQSHLRGDTDVVTVVTFEFSSTDPRVDSGKWPKYTVFR   |
| B/Ann Arbor/1/1966 | IGSLFVSGREKSVYLYCRVNGTNKIQMKWGMEARRCLLQSMQOMEAIVDQESSIQGYDMT   |
| B/Brisbane/60/2008 | IGSLFVSGREKSVYLYCRVNGTNKIQMKWGMEARRCLLQSMQOMEAIVEQESSIQGYDMT   |
| B/Ann Arbor/1/1966 | KACFKGDRVNSPKTFSIGTQEGKLVKGSFGKALRVIFTKCLMHYVFGNAQLEGFSAESRR   |
| B/Brisbane/60/2008 | KACFKGDRVNSPKTFSIGTQEGKLVKGSFGKALRVIFTKCLMHYVFGNAQLEGFSAESRR   |
| B/Ann Arbor/1/1966 | LLLLIQALKDRKGPWFVDLEGMYSGIEECISNNPWVIQSAVYWFNEWLGFEKEGSKVLESI  |
| B/Brisbane/60/2008 | LLLLIQALKDRKGPWFVDLEGMYSGIEECISNNPWVIQSVYWFNEWLGFEKEGNKVLESV   |
| B/Ann Arbor/1/1966 | DEIMDE                                                         |
| B/Brisbane/60/2008 | DEIMDE                                                         |

■ = amino acid identical

□ = amino acid changes

■ = amino acid changes present in the cold adapted MDV

## Amino acid changes:

|       |       |
|-------|-------|
| T60A  | N86T  |
| R105K | H160S |
| I196V | K210R |
| K258T | S271D |
| Y387C | V428I |
| D589E | A700V |
| S714N | I720V |

## Amino acid alignment of B/Ann Arbor/1/1966 and B/Brisbane/60/2008 NP

|                    |                                                                |
|--------------------|----------------------------------------------------------------|
| B/Ann Arbor/1/1966 | MSNMIDIDGINTGTIDKTPEEITSGTSGATRPIIKPATLAPPSNKRTRNPSPERATTSSSEA |
| B/Brisbane/60/2008 | MSNMIDIDGINTGTIDKTPEEITSGTSGTTRPIIRPATLAPPSNKRTRNPSPERATTSSSED |
| B/Ann Arbor/1/1966 | IVGRRITQKKQTPTEIKKSVYNMVKLGEFYNQMMVKAGLNDDMERNLIQNAHAVERILLA   |
| B/Brisbane/60/2008 | DVGRKITQKKQTPTEIKKSVYNMVKLGEFYNQMMVKAGLNDDMERNLIQNAHAERILLA    |
| B/Ann Arbor/1/1966 | ATDDKKTEYQKKKNARDVKEGKEEIDHNKTGGTFYKMRDDKTIYFSPIRITFLKEEVKT    |
| B/Brisbane/60/2008 | ATDDKKTEFQKKKNARDVKEGKEEIDHNKTGGTFYKMRDDKTIYFSPIRITFLKEEVKT    |
| B/Ann Arbor/1/1966 | MYKTTMGSDGFSGLNHIMIGHSQMNDVCFQRSKALKRVGLDPSLISTFAGSTLPRRSGAT   |
| B/Brisbane/60/2008 | MYKTTMGSDGFSGLNHIMIGHSQMNDVCFQRSKALKRVGLDPSLISTFAGSTVPRRSGAT   |
| B/Ann Arbor/1/1966 | GVAIKGGGTLVAEAIRFIGRAMADRGLLRDIRAKTAYEKILLNLKNKCSAPQQKALVDQV   |
| B/Brisbane/60/2008 | GVAIKGGGTLVAEAIRFIGRAMADRGLLRDIKAKTAYEKILLNLKNKCSAPQQKALVDQV   |
| B/Ann Arbor/1/1966 | IGSRNPGIADIEDLTLLARSMVVVRPSVASKVVLPIISINAKIPQLGFNVEEYSMVGYEAM  |
| B/Brisbane/60/2008 | IGSRNPGIADIEDLTLLARSMVVVRPSVASKVVLPISIYAKIPQLGFNVEEYSMVGYEAM   |
| B/Ann Arbor/1/1966 | ALYNMATPVSILRMGDDAKDKSQLFFMSCFGAAYEDQRVLSALTGTEFKPRSALKCKGFH   |
| B/Brisbane/60/2008 | ALYNMATPVSILRMGDDAKDKSQLFFMSCFGAAYEDLRVLSALTGTEFKPRSALKCKGFH   |
| B/Ann Arbor/1/1966 | VPAKEQVEGMGAALMSIKLQFWAPMTRSGGNEVGGDGGSGQISCSPVFAVERPIALSKQA   |
| B/Brisbane/60/2008 | VPAKEQVEGMGAALMSIKLQFWAPMTRSGGNEVGGDGGSGQISCSPVFAVERPIALSKQA   |
| B/Ann Arbor/1/1966 | VRRMLSMNIEGRDADVKGNNLLKMMNDSMAKKTN                             |
| B/Brisbane/60/2008 | VRRMLSMNIEGRDADVKGNNLLKMMNDSMAKKTS                             |
| B/Ann Arbor/1/1966 | TIPNFFFGRDTAEDYDDL                                             |
| B/Brisbane/60/2008 | TIPNFFFGRDTAEDYDDL                                             |

■ = amino acid identical

□ = amino acid changes

■ = amino acid changes present in the cold adapted MDV

### Amino acid changes:

|       |       |
|-------|-------|
| A28T  | K34R  |
| A60D  | I61D  |
| R65K  | V114A |
| Y129E | L233V |
| R272K | N339Y |
| Q397L | N513S |
| I531T | V534I |
| D535E |       |

# Amino acid alignment of B/Ann Arbor/1/1966 and B/Brisbane/60/2008 M1

|                    |                                                               |
|--------------------|---------------------------------------------------------------|
| B/Ann Arbor/1/1966 | MSLFGDTIAYLLSLTEDGEGKAELAELKLCWFGGKEFDLDSALEWIKNKRCLTDIQKALI  |
| B/Brisbane/60/2008 | MSLFGDTIAYLLSLTEDGEGKAELAELKLCWFGGKEFDLDSALEWIKNKRCLTDIQKALI  |
| B/Ann Arbor/1/1966 | GASICFLKPKDQERKRRFITEPLSGMGTTATKKKGLILAERKMRRCVSFHEAFEIAEGHE  |
| B/Brisbane/60/2008 | GASICFLKPKDQERKRRFITEPLSGMGTTATKKKGLILAERKMRRCVSFHEAFEIAEGHE  |
| B/Ann Arbor/1/1966 | SSALLYCLMVMYLNPGNYSMQVKLGTLCALCEKQASHSHRAHSRAARSSVPGVRREMOMV  |
| B/Brisbane/60/2008 | SSALLYCLMVMYLNPGNYSMQVKLGTLCALCEKQASHSHRAHSRAARSSVPGVRREMOMV  |
| B/Ann Arbor/1/1966 | SAMNTAKTMNGMGKGEDVQKLAEEQLSNIGVLRSLGASQKNAGEGIAKDVMEVLKQSSMGN |
| B/Brisbane/60/2008 | SAMNTAKTMNGMGKGEDVQKLAEEQLSNIGVLRSLGASQKNAGEGIAKDVMEVLKQSSMGN |
| B/Ann Arbor/1/1966 | SALVKKYL                                                      |
| B/Brisbane/60/2008 | SALVKKYL                                                      |

■ = amino acid identical

■ = amino acid changes present in the cold adapted MDV

## Amino acid changes:

None

# Amino acid alignment of B/Ann Arbor/1/1966 and B/Brisbane/60/2008 M2

|                    |           |              |                |    |         |                   |
|--------------------|-----------|--------------|----------------|----|---------|-------------------|
| B/Ann Arbor/1/1966 | MLEPFQILS | ICSFILSALHFM | AWTIGHLNQIKRGV | NL | KIRIRN  | PNKETINREVSILRHSY |
| B/Brisbane/60/2008 | MLEPFQILT | ICSFILSALHFM | AWTIGHLNQIKRG  | IN | MKIRIKG | PNKETINREVSILRHSY |

|                    |                      |         |                         |                     |      |
|--------------------|----------------------|---------|-------------------------|---------------------|------|
| B/Ann Arbor/1/1966 | QKEIQAKETMKEVLSDNMEI | ILSDHIV | IEGLSAEEIIKMGETVLEVEELQ |                     |      |
| B/Brisbane/60/2008 | QKEIQAKETMKEVLSDNMEV | LN      | DHII                    | IEGLSAEEIIKMGETVLEI | EELH |

■ = amino acid identical

□ = amino acid changes

## Amino acid changes:

|       |       |
|-------|-------|
| S9T   | V35I  |
| L37M  | R42K  |
| N43G  | I80V  |
| S82N  | V86I  |
| V105I | Q109H |

## Amino acid alignment of B/Ann Arbor/1/1966 and B/Brisbane/60/2008 NS1

|                    |                                                                 |
|--------------------|-----------------------------------------------------------------|
| B/Ann Arbor/1/1966 | MAD-NMTTQTQIEVGPGATNATINFEAGILECYERLSSQRALDYPGQDRNLRLKRLKLESRI  |
| B/Brisbane/60/2008 | MANN-NMTTQTQIEVGPGATNATINFEAGILECYERLSWQRALDYPGQDRNLRLKRLKLESRI |
| B/Ann Arbor/1/1966 | KTHNKSEPESEKSRMSLEERKAIGVKMMKVLLFMNPSAGIEGFEPYCMKNSSNSNCPNCNWT  |
| B/Brisbane/60/2008 | KTHNKSEPESEKSRMSLEERKAIGVKMMKVLLFMNPSAGIEGFEPYCMKSSNSNCTKYNWT   |
| B/Ann Arbor/1/1966 | DYPPTPGKCLDDIEEEPENVDDPTEIVLRDMNNKDARQKIKEEVNTQKEGKFRLTIKRDI    |
| B/Brisbane/60/2008 | DYPSTPERCLDDIEEEPEDVDGPTEIVLRDMNNKDARQKIKEEVNTQKEGKFRLTIKRDM    |
| B/Ann Arbor/1/1966 | RNVLSLRVLVNGTFLKHPNGYKSLSTLHRLNAYDQSGRLVAKLVATDDLTVEDEEDGHRI    |
| B/Brisbane/60/2008 | RNVLSLRVLVNGTFLKHPNGHKSLSTLHRLNAYDQSGRLVAKLVATDDLTVEDEEDGHRI    |
| B/Ann Arbor/1/1966 | LNSLFERFNEGHSKPIRAAETAVGVLSQFGQEHRLSPEEGDN                      |
| B/Brisbane/60/2008 | LNSLFERLNEGHSKPIRAAETAVGVLSQFGQEHRLSPEEGDN                      |

■ = amino acid identical  
□ = amino acid changes

### Amino acid changes:

|       |       |
|-------|-------|
| D3N   | Δ4N   |
| S37W  | N107S |
| P114T | N115K |
| C116Y | P123S |
| G126E | K127R |
| N138D | D141G |
| Y200H | F247L |

# Amino acid alignment of B/Ann Arbor/1/1966 and B/Brisbane/60/2008 NEP

|                    |                                                                |
|--------------------|----------------------------------------------------------------|
| B/Ann Arbor/1/1966 | MAD-NMTTTQIEWRMKKMAIGSSTHSSSVLMKDIIQSQFEQLKLRWESYPNLVKSTDYHQR  |
| B/Brisbane/60/2008 | MANNNMNTTTQIEWRMKKMAIGSSTHSSSVLMKDIIQSQFEQLKLRWESYPNLVKSTDYHQK |
| B/Ann Arbor/1/1966 | RETIRLVTEELYLLSKRIDDNILFHKTIVIANSSIIADMTIVSLSLLETLYEMKDVVEVYSR |
| B/Brisbane/60/2008 | RETIRLVTEELYLLSKRIDDNILFHKTIVIANSSIIADMTVVSLSLLETLYEMKDVVEVYSR |
| B/Ann Arbor/1/1966 | QCL                                                            |
| B/Brisbane/60/2008 | QCL                                                            |

  = amino acid identical  
 = amino acid changes

## Amino acid changes:

|      |      |
|------|------|
| D3N  | Δ4N  |
| R60K | I99V |
